# Supplementary material for: Changing the Health Behavior of Patients With Cardiovascular Disease Through an Electronic Health Intervention in Three Different Countries: Cost-Effectiveness Study in the Do Cardiac Health: Advanced New Generation Ecosystem (Do CHANGE) 2 Randomized Controlled Trial
Source: PubMed Central journal article supplement (PMC7420510; doi:10.2196/17351), 2020-07-28
Supplement: jmir_v22i7e17351_app1.pdf [file jmir_v22i7e17351_app1.pdf]

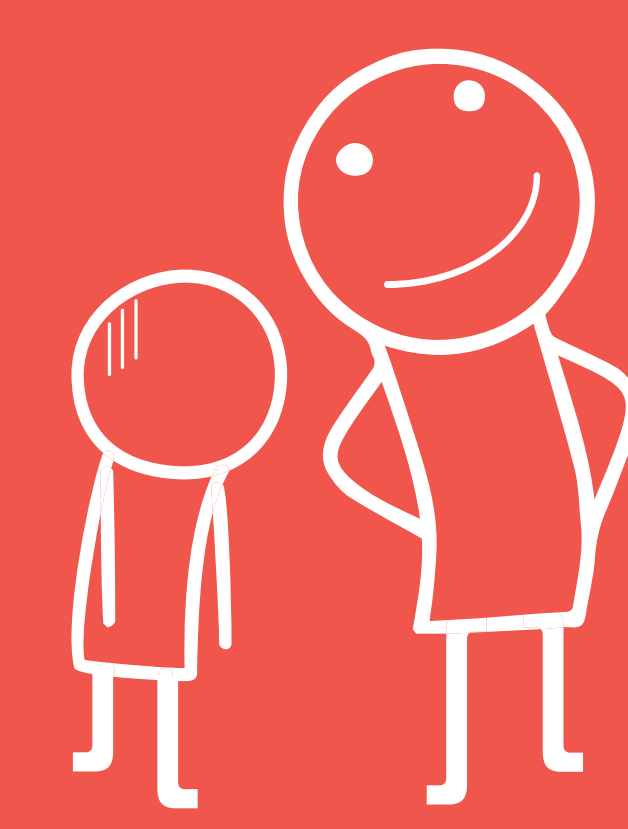

**Do  
CHANGE**

# Do Cardiac Health: Advanced New Generation Ecosystem

February 2015- April 2018

- Self-management programme for people with cardiac diseases to change their habits and learn to enjoy a healthier lifestyle;
- Personalisation based on the person's habits, personality and real-time information from different sensors and existing medical devices;
- Person controlled data storage and access on nutrition, activity, hydration, health, behaviour and habits.

**Do CHANGE for a better and healthier lifestyle!**

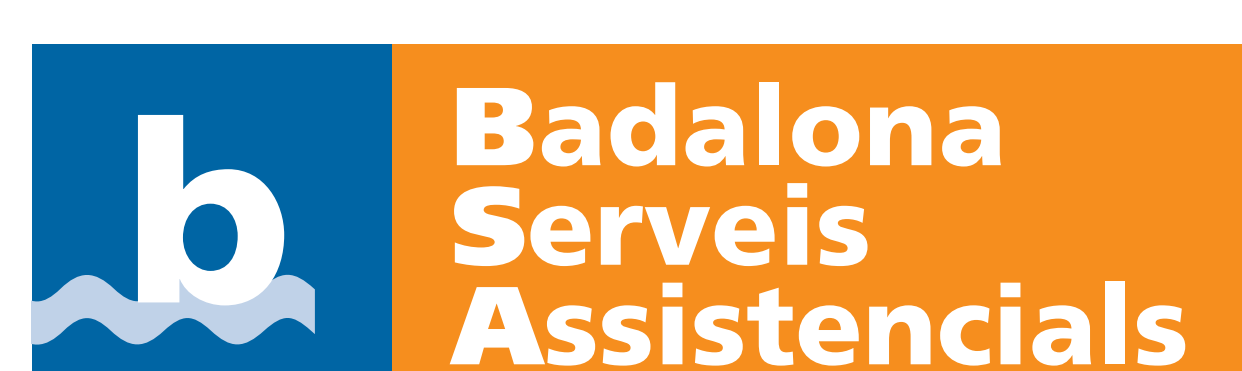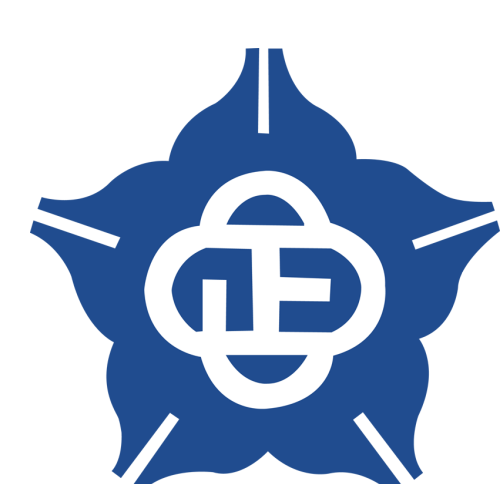

**Docobo**<sup>TM</sup>  
towards a better quality of life

**Do**  
Something  
Different

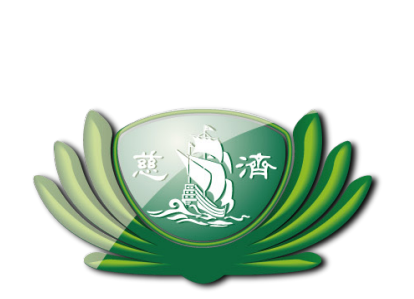

佛教慈濟醫療財團法人大林慈濟醫院  
Dalín Tzu Chi Hospital, Buddhist Tzu Chi Medical Foundation

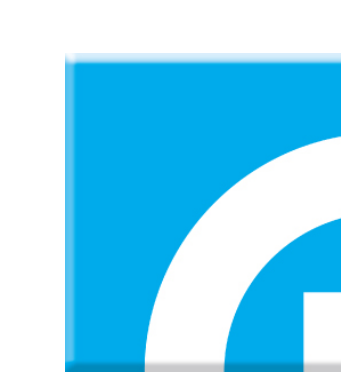

**ITRI**  
Industrial Technology  
Research Institute

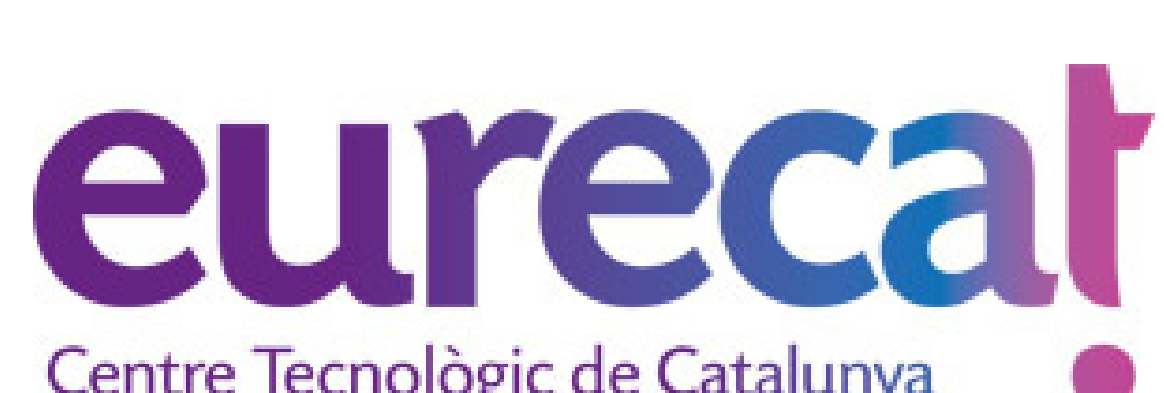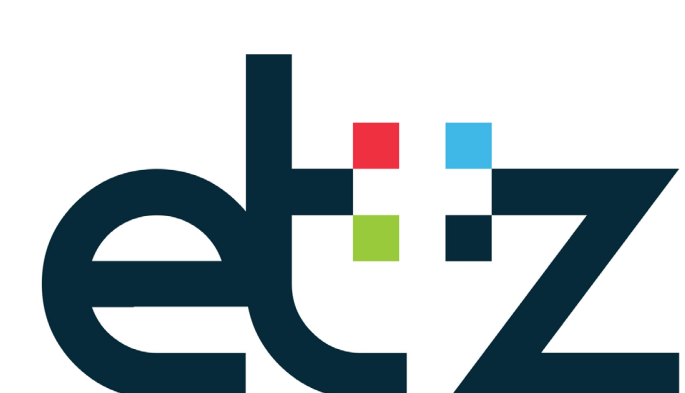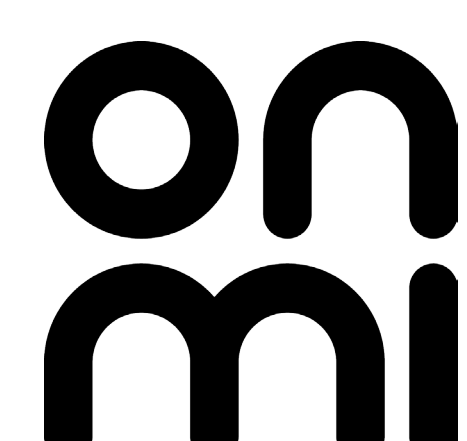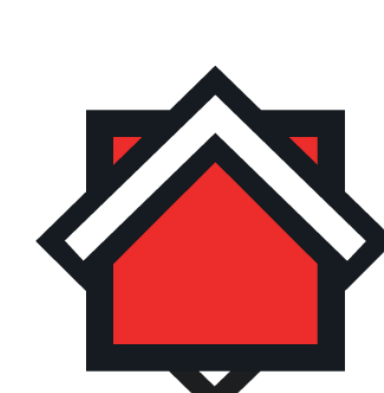

**Smart Homes**

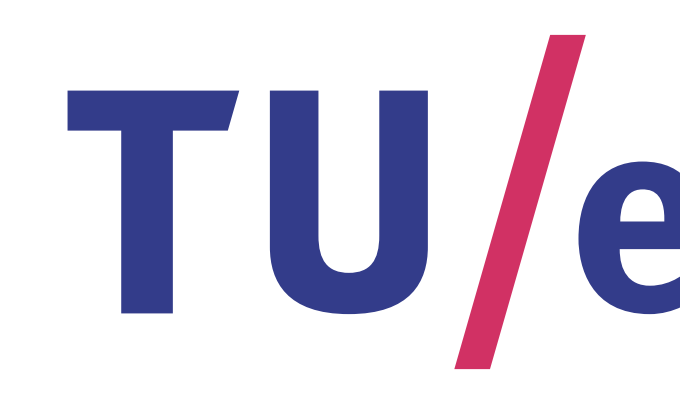

Technische Universiteit  
Eindhoven  
University of Technology

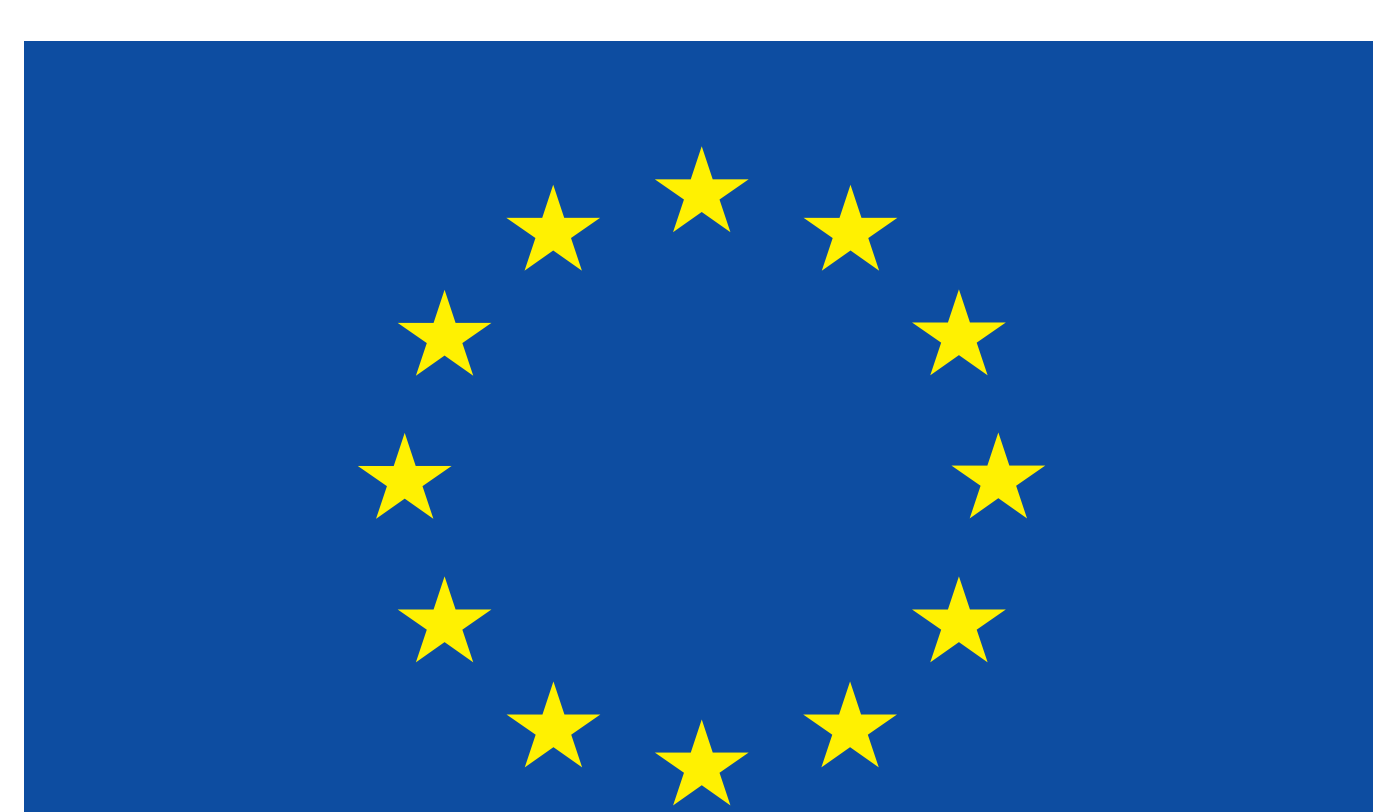

Co-funded by the Horizon 2020  
Framework Programme of the European Union  
(4,7 million)

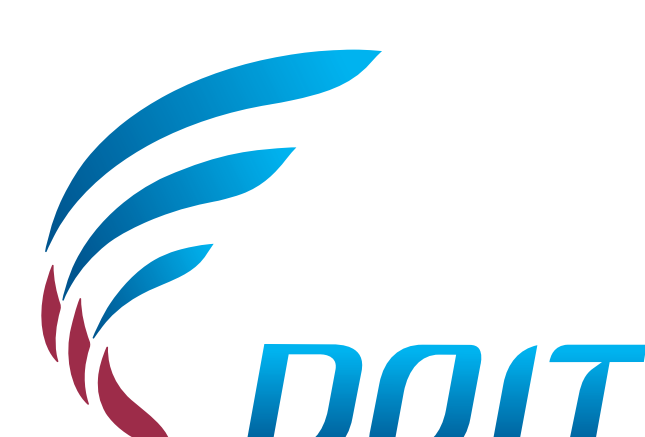

經濟部技術處  
Ministry of Economic Affairs

Co-funded by the department  
of industrial technology Taiwan  
(1 million)
