# Supplementary material for: Changing the Health Behavior of Patients With Cardiovascular Disease Through an Electronic Health Intervention in Three Different Countries: Cost-Effectiveness Study in the Do Cardiac Health: Advanced New Generation Ecosystem (Do CHANGE) 2 Randomized Controlled Trial
Source: PubMed Central journal article supplement (PMC7420510; doi:10.2196/17351), 2020-07-28
Supplement: jmir_v22i7e17351_app2.pdf [file jmir_v22i7e17351_app2.pdf]

|                                                  |                                                | Spain          | The Netherlands | Taiwan         | Total             |
|--------------------------------------------------|------------------------------------------------|----------------|-----------------|----------------|-------------------|
| <b>Primary diagnoses</b>                         |                                                |                |                 |                |                   |
| Heart Failure<br><i>n (%)</i>                    | Do CHANGE<br>( <i>intervention condition</i> ) | 7 (18.4)       | 9 (23.7)        | 4 (9.1)        | 20 (16.7)         |
|                                                  | Care-as-usual ( <i>control condition</i> )     | 9 (24.3)       | 8 (21.6)        | 2 (4.5)        | 19 (16.1)         |
|                                                  | Total                                          | 16 (21.3)      | 17 (22.7)       | 6 (6.8)        | 39 (16.4)         |
| Hypertension<br><i>n (%)</i>                     | Do CHANGE<br>( <i>intervention condition</i> ) | 24 (63.2)      | 11 (28.9)       | 27 (61.4)      | 62 (51.7)         |
|                                                  | Care-as-usual<br>( <i>control condition</i> )  | 22 (59.5)      | 10 (27.0)       | 31 (70.5)      | 63 (53.4)         |
|                                                  | Total                                          | 46 (61.3)      | 21 (28.0)       | 58 (65.9)      | 125 (52.5)        |
| Cardiovascular<br>Artery Disease<br><i>n (%)</i> | Do CHANGE<br>( <i>intervention condition</i> ) | 7 (18.4)       | 18 (47.4)       | 13 (29.5)      | 38 (31.7)         |
|                                                  | Care-as-usual<br>( <i>control condition</i> )  | 6 (16.2)       | 19 (51.4)       | 11 (25.0)      | 36 (30.5)         |
|                                                  | Total                                          | 13 (17.3)      | 37 (49.3)       | 24 (27.3)      | 74 (31.1)         |
| <b>Other clinical characteristics</b>            |                                                |                |                 |                |                   |
| Diabetes Mellitus<br><i>n (%)</i>                | Do CHANGE<br>( <i>intervention condition</i> ) | 9 (23.7)       | 9 (23.7)        | 4 (9.1)        | 22 (18.3)         |
|                                                  | Care-as-usual<br>( <i>control condition</i> )  | 6 (16.2)       | 9 (24.3)        | 1 (2.3)        | 16 (13.6)         |
|                                                  | Total                                          | 15 (20.0)      | 18 (24.0)       | 5 (5.7)        | 38 (16.0)         |
| SBP (mmHg)<br><i>mean (SD)</i>                   | Do CHANGE<br>( <i>intervention condition</i> ) | 133.24 (18.92) | 143.50 (27.44)  | 128.68 (18.68) | 134.88<br>(22.57) |
|                                                  | Care-as-usual<br>( <i>control condition</i> )  | 135.78 (13.92) | 143.81 (22.13)  | 133.27 (12.84) | 137.36<br>(17.06) |
|                                                  | Total                                          | 134.49 (16.58) | 143.65 (24.80)  | 131.07 (16.09) | 136.11<br>(20.03) |
| DBP (mmHg)<br><i>mean (SD)</i>                   | Do CHANGE<br>( <i>intervention condition</i> ) | 77.87 (11.35)  | 83.63 (15.58)   | 76.82 (13.76)  | 79.31 (13.89)     |
|                                                  | Care-as-usual<br>( <i>control condition</i> )  | 77.78 (9.67)   | 81.14 (12.23)   | 82.57 (9.61)   | 80.62 (10.62)     |
|                                                  | Total                                          | 77.83 (10.49)  | 82.40 (13.00)   | 79.69 (12.15)  | 79.96 (12.37)     |

|                                           |                                                |               |               |               |               |
|-------------------------------------------|------------------------------------------------|---------------|---------------|---------------|---------------|
| Heart Rate (rest; beats/min)<br>mean (SD) | Do CHANGE<br>( <i>intervention condition</i> ) | 72.03 (10.17) | 68.34 (14.33) | 68.48 (12.65) | 69.56 (12.52) |
|                                           | Care-as-usual<br>( <i>control condition</i> )  | 71.08 (10.05) | 67.14 (12.71) | 71.77 (11.00) | 70.10 (11.38) |
|                                           | Total                                          | 71.56 (10.05) | 67.75 (13.48) | 70.13 (11.90) | 69.83 (11.94) |
| CCI score<br>mean (SD)                    | Do CHANGE<br>( <i>intervention condition</i> ) | 0.79 (0.88)   | 1.32 (0.99)   | 0.66 (1.10)   | 0.91 (1.03)   |
|                                           | Care-as-usual<br>( <i>control condition</i> )  | 1.03 (0.99)   | 1.41 (0.83)   | 0.32 (0.52)   | 0.88 (0.91)   |
|                                           | Total                                          | 0.91 (0.93)   | 1.36 (0.91)   | 0.49 (0.87)   | 0.89 (0.97)   |
| BMI (kg/m <sup>2</sup> )<br>mean (SD)     | Do CHANGE<br>( <i>intervention condition</i> ) | 29.0 (5.4)    | 29.3 (4.3)    | 25.4 (4.2)    | 27.8 (5.0)    |
|                                           | Care-as-usual<br>( <i>control condition</i> )  | 29.4 (6.0)    | 29.1 (5.0)    | 26.1 (2.7)    | 28.1 (4.9)    |
|                                           | Total                                          | 29.2 (5.7)    | 29.2 (4.6)    | 25.8 (3.6)    | 27.9 (4.9)    |
| <b>Medication<br/>n (%)</b>               |                                                |               |               |               |               |
| Antiplatelet                              | Do CHANGE<br>( <i>intervention condition</i> ) | 11 (28.9)     | 34 (89.5)     | 15 (34.1)     | 60 (50.0)     |
|                                           | Care-as-usual<br>( <i>control condition</i> )  | 17 (45.9)     | 25 (67.6)     | 11 (25.0)     | 53 (44.9)     |
|                                           | Total                                          | 28 (37.3)     | 59 (78.7)     | 26 (29.5)     | 113 (47.5)    |
| Statins                                   | Do CHANGE<br>( <i>intervention condition</i> ) | 19 (50.0)     | 28 (73.7)     | 28 (63.6)     | 75 (62.5)     |
|                                           | Care-as-usual<br>( <i>control condition</i> )  | 22 (59.5)     | 24 (64.9)     | 21 (47.7)     | 67 (56.8)     |
|                                           | Total                                          | 41 (54.7)     | 52 (69.3)     | 49 (55.7)     | 142 (59.7)    |
| Beta-blockers                             | Do CHANGE<br>( <i>intervention condition</i> ) | 15 (39.5)     | 28 (73.7)     | 23 (52.3)     | 66 (55.0)     |
|                                           | Care-as-usual<br>( <i>control condition</i> )  | 18 (48.6)     | 23 (62.2)     | 14 (31.8)     | 55 (46.6)     |
|                                           | Total                                          | 33 (44.0)     | 51 (68.0)     | 37 (42.0)     | 121 (50.8)    |
| ACE-inhibitors                            | Do CHANGE<br>( <i>intervention condition</i> ) | 14 (36.8)     | 19 (50.0)     | 11 (25.0)     | 44 (36.7)     |
|                                           | Care-as-usual<br>( <i>control condition</i> )  | 8 (21.6)      | 13 (35.1)     | 19 (43.2)     | 40 (33.9)     |
|                                           | Total                                          | 22 (29.3)     | 32 (42.7)     | 30 (34.1)     | 84 (35.3)     |

|                                    |                                                |              |              |              |              |
|------------------------------------|------------------------------------------------|--------------|--------------|--------------|--------------|
| ARB                                | Do CHANGE<br>( <i>intervention condition</i> ) | 12 (31.3)    | 11 (28.9)    | 12 (27.3)    | 35 (29.2)    |
|                                    | Care-as-usual<br>( <i>control condition</i> )  | 17 (45.9)    | 10 (27.0)    | 12 (27.3)    | 39 (33.1)    |
|                                    | Total                                          | 29 (38.7)    | 21 (28.0)    | 24 (27.3)    | 74 (31.1)    |
| Calcium antagonist                 | Do CHANGE<br>( <i>intervention condition</i> ) | 6 (15.8)     | 9 (23.7)     | 15 (34.1)    | 30 (25.0)    |
|                                    | Care-as-usual<br>( <i>control condition</i> )  | 11 (29.7)    | 8 (21.6)     | 15 (34.1)    | 34 (28.8)    |
|                                    | Total                                          | 17 (22.7)    | 17 (22.7)    | 30 (34.1)    | 64 (26.9)    |
| Psychotropic medication            | Do CHANGE<br>( <i>intervention condition</i> ) | 8 (21.1)     | 4 (10.5)     | 7 (15.9)     | 19 (15.8)    |
|                                    | Care-as-usual<br>( <i>control condition</i> )  | 17 (45.9)    | 6 (16.2)     | 7 (15.9)     | 30 (25.4)    |
|                                    | Total                                          | 25 (33.3)    | 10 (13.3)    | 14 (15.0)    | 49 (20.6)    |
| <b>Psychological symptoms</b>      |                                                |              |              |              |              |
| PHQ-9<br><i>mean (SD)</i>          | Do CHANGE<br>( <i>intervention condition</i> ) | 3.9 (3.0)    | 3.8 (4.3)    | 5.6 (5.1)    | 4.5 (4.3)    |
|                                    | Care-as-usual<br>( <i>control condition</i> )  | 4.4 (3.2)    | 4.0 (3.7)    | 2.9 (2.6)    | 3.7 (3.2)    |
|                                    | Total                                          | 4.2 (3.1)    | 3.9 (4.0)    | 4.3 (4.3)    | 4.1 (3.8)    |
| GAD-7<br><i>mean (SD)</i>          | Do CHANGE<br>( <i>intervention condition</i> ) | 4.3 (3.3)    | 2.8 (3.5)    | 3.7 (4.0)    | 3.6 (3.6)    |
|                                    | Care-as-usual<br>( <i>control condition</i> )  | 4.3 (2.8)    | 3.1 (4.0)    | 3.6 (4.1)    | 6.7 (3.7)    |
|                                    | Total                                          | 4.3 (3.0)    | 3.0 (3.7)    | 3.6 (4.0)    | 3.6 (3.7)    |
| Type D personality<br><i>n (%)</i> | Do CHANGE<br>( <i>intervention condition</i> ) | 4 (10.5)     | 6 (15.8)     | 10 (22.7)    | 20 (16.7)    |
|                                    | Care-as-usual<br>( <i>control condition</i> )  | 3 (8.1)      | 8 (21.6)     | 7 (15.9)     | 18 (15.3)    |
|                                    | Total                                          | 7 (9.3)      | 14 (18.7)    | 17 (19.3)    | 38 (16.0)    |
| HPLP II<br><i>mean (SD)</i>        | Do CHANGE<br>( <i>intervention condition</i> ) | 136.2 (27.2) | 128.0 (19.7) | 142.1 (23.6) | 135.7 (24.2) |
|                                    | Care-as-usual<br>( <i>control condition</i> )  | 143.5 (19.6) | 128.7 (18.4) | 141.5 (20.7) | 138.1 (20.5) |

|                  |                                                    |              |              |              |              |
|------------------|----------------------------------------------------|--------------|--------------|--------------|--------------|
|                  | Total                                              | 139.8 (23.9) | 128.3 (18.9) | 141.8 (22.1) | 136.9 (22.4) |
| QoL<br>mean (SD) | Do CHANGE<br>( <i>intervention<br/>condition</i> ) | 101.1 (9.9)  | 99.3 (15.9)  | 93.5 (11.7)  | 97.7 (13.0)  |
|                  | Care-as-usual<br>( <i>control condition</i> )      | 96.8 (12.7)  | 99.7 (13.3)  | 92.8 (9.4)   | 96.2 (12.1)  |
|                  | Total                                              | 99.0 (11.5)  | 99.5 (14.6)  | 93.1 (10.6)  | 97.0 (12.5)  |

**ACE:** Angiotensin-Converting-Enzyme; **ARB:** Angiotensin II Receptor Blocker; **BMI:** Body Mass Index; **CAD:** Coronary Artery Disease; **CCI:** Charlson Comorbidity Index; **DBP:** Diastolic Blood Pressure; **GAD-7:** General Anxiety Disorder-7; **HCU:** healthcare utilization; **HF:** Heart failure; **HPLP II:** Health Promoting Lifestyle Profile II questionnaire; **HT:** Hypertension; **PHQ-9:** Patient Health Questionnaire - 9; **SBP:** Systolic Blood Pressure; **SD:** Standard Deviation; **QoL:** Quality of Life.
