# Supplementary material for: Changing the Health Behavior of Patients With Cardiovascular Disease Through an Electronic Health Intervention in Three Different Countries: Cost-Effectiveness Study in the Do Cardiac Health: Advanced New Generation Ecosystem (Do CHANGE) 2 Randomized Controlled Trial
Source: PubMed Central journal article supplement (PMC7420510; doi:10.2196/17351), 2020-07-28
Supplement: jmir_v22i7e17351_app4.pdf [file jmir_v22i7e17351_app4.pdf]

## **Incremental costs and effects (age and gender specific)**

Incremental cost and health-related quality of life are shown here for every age-gender combination in the specified target population. On the one hand, incremental costs refer to the difference between the cost that a person from a specific age and gender would have if he/she received the intervention minus the cost that would have if he/she followed current care. On the other hand, the incremental effects values show how much quality of life (utility) is gained when the intervention is used instead of the standard care. These are also shown per age-gender group. Both the discounted and the undiscounted incremental outcomes are presented. This information is also provided in the tables below per each pilot site participating in the Do CHANGE 2 project (Spain, the Netherlands and Taiwan).

# Spain

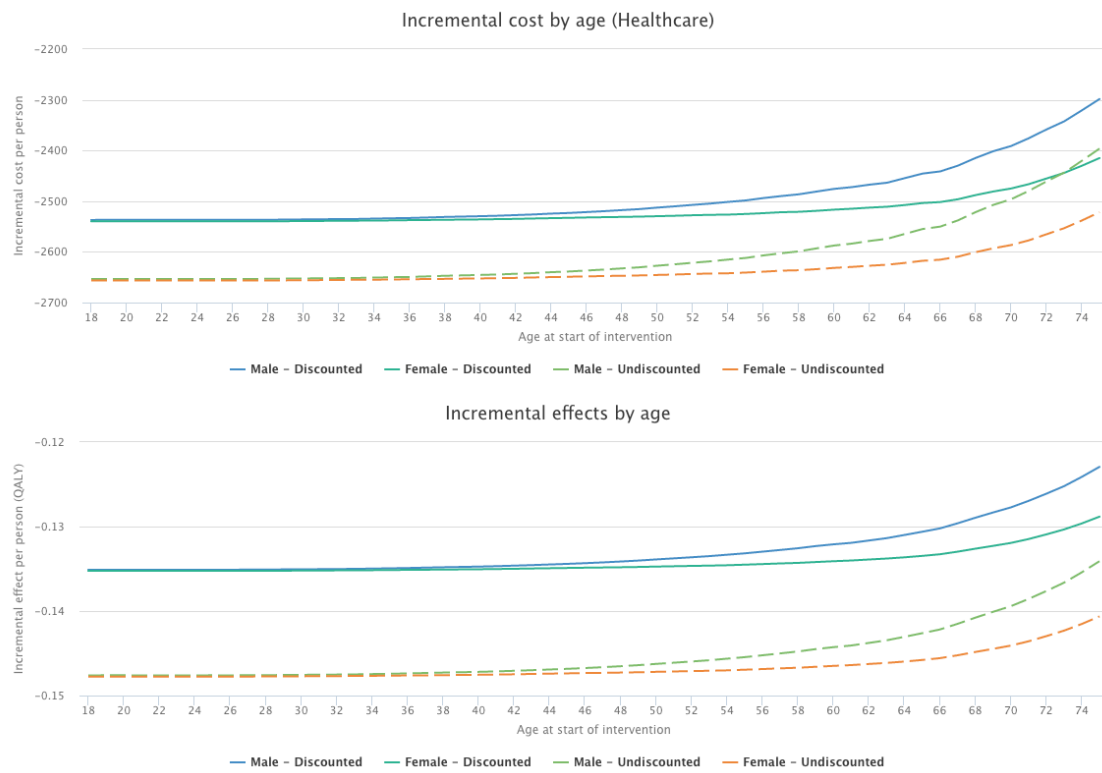

**Figure 1:** Incremental cost and effects by age for Spain.

**Table 1:** Incremental costs and effects for Spain (Male)

| Age | Incremental cost (Healthcare) | Incremental effects | Undiscounted incremental cost (Healthcare) | Undiscounted incremental effects |
|-----|-------------------------------|---------------------|--------------------------------------------|----------------------------------|
| 18  | -2537.03                      | -0.135              | -2653.57                                   | -0.148                           |
| 19  | -2536.78                      | -0.135              | -2653.31                                   | -0.148                           |
| 20  | -2536.78                      | -0.135              | -2653.31                                   | -0.148                           |
| 21  | -2536.82                      | -0.135              | -2653.35                                   | -0.148                           |
| 22  | -2536.88                      | -0.135              | -2653.42                                   | -0.148                           |
| 23  | -2536.95                      | -0.135              | -2653.49                                   | -0.148                           |
| 24  | -2536.91                      | -0.135              | -2653.44                                   | -0.148                           |
| 25  | -2536.76                      | -0.135              | -2653.29                                   | -0.148                           |
| 26  | -2536.87                      | -0.135              | -2653.40                                   | -0.148                           |
| 27  | -2536.77                      | -0.135              | -2653.29                                   | -0.148                           |
| 28  | -2536.72                      | -0.135              | -2653.23                                   | -0.148                           |
| 29  | -2536.29                      | -0.135              | -2652.77                                   | -0.148                           |
| 30  | -2535.95                      | -0.135              | -2652.41                                   | -0.148                           |
| 31  | -2535.62                      | -0.135              | -2652.05                                   | -0.148                           |
| 32  | -2535.35                      | -0.135              | -2651.76                                   | -0.148                           |
| 33  | -2535.11                      | -0.135              | -2651.49                                   | -0.147                           |
| 34  | -2534.38                      | -0.135              | -2650.71                                   | -0.147                           |
| 35  | -2533.68                      | -0.135              | -2649.96                                   | -0.147                           |
| 36  | -2533.17                      | -0.135              | -2649.39                                   | -0.147                           |
| 37  | -2532.18                      | -0.135              | -2648.33                                   | -0.147                           |
| 38  | -2531.09                      | -0.135              | -2647.16                                   | -0.147                           |
| 39  | -2530.33                      | -0.135              | -2646.34                                   | -0.147                           |
| 40  | -2529.57                      | -0.135              | -2645.52                                   | -0.147                           |
| 41  | -2528.69                      | -0.135              | -2644.56                                   | -0.147                           |
| 42  | -2527.42                      | -0.135              | -2643.20                                   | -0.147                           |
| 43  | -2526.18                      | -0.135              | -2641.86                                   | -0.147                           |
| 44  | -2524.49                      | -0.134              | -2640.04                                   | -0.147                           |
| 45  | -2523.26                      | -0.134              | -2638.70                                   | -0.147                           |
| 46  | -2521.48                      | -0.134              | -2636.78                                   | -0.147                           |
| 47  | -2519.70                      | -0.134              | -2634.87                                   | -0.147                           |
| 48  | -2517.61                      | -0.134              | -2632.61                                   | -0.147                           |
| 49  | -2515.59                      | -0.134              | -2630.42                                   | -0.146                           |
| 50  | -2512.65                      | -0.134              | -2627.25                                   | -0.146                           |
| 51  | -2510.10                      | -0.134              | -2624.50                                   | -0.146                           |
| 52  | -2507.29                      | -0.134              | -2621.48                                   | -0.146                           |

| Age | Incremental cost (Healthcare) | Incremental effects | Undiscounted incremental cost (Healthcare) | Undiscounted incremental effects |
|-----|-------------------------------|---------------------|--------------------------------------------|----------------------------------|
| 53  | -2504.67                      | -0.133              | -2618.65                                   | -0.146                           |
| 54  | -2501.44                      | -0.133              | -2615.16                                   | -0.146                           |
| 55  | -2498.51                      | -0.133              | -2611.98                                   | -0.145                           |
| 56  | -2493.86                      | -0.133              | -2606.99                                   | -0.145                           |
| 57  | -2489.93                      | -0.133              | -2602.75                                   | -0.145                           |
| 58  | -2486.44                      | -0.133              | -2598.96                                   | -0.145                           |
| 59  | -2481.00                      | -0.132              | -2593.11                                   | -0.145                           |
| 60  | -2475.73                      | -0.132              | -2587.46                                   | -0.144                           |
| 61  | -2472.25                      | -0.132              | -2583.71                                   | -0.144                           |
| 62  | -2467.38                      | -0.132              | -2578.43                                   | -0.144                           |
| 63  | -2463.50                      | -0.131              | -2574.18                                   | -0.143                           |
| 64  | -2454.47                      | -0.131              | -2564.49                                   | -0.143                           |
| 65  | -2445.52                      | -0.131              | -2554.91                                   | -0.143                           |
| 66  | -2441.23                      | -0.130              | -2550.13                                   | -0.142                           |
| 67  | -2429.84                      | -0.130              | -2537.82                                   | -0.142                           |
| 68  | -2414.68                      | -0.129              | -2521.56                                   | -0.141                           |
| 69  | -2401.42                      | -0.128              | -2507.30                                   | -0.140                           |
| 70  | -2391.23                      | -0.128              | -2496.25                                   | -0.139                           |
| 71  | -2375.90                      | -0.127              | -2479.72                                   | -0.139                           |
| 72  | -2358.58                      | -0.126              | -2461.09                                   | -0.138                           |
| 73  | -2342.60                      | -0.125              | -2443.80                                   | -0.137                           |
| 74  | -2320.88                      | -0.124              | -2420.42                                   | -0.135                           |
| 75  | -2298.55                      | -0.123              | -2396.32                                   | -0.134                           |

**Table 2:** Incremental costs and effects for Spain (Female)

| Age | Incremental cost (Healthcare) | Incremental effects | Undiscounted incremental cost (Healthcare) | Undiscounted incremental effects |
|-----|-------------------------------|---------------------|--------------------------------------------|----------------------------------|
| 18  | -2539.76                      | -0.135              | -2656.52                                   | -0.148                           |
| 19  | -2539.80                      | -0.135              | -2656.56                                   | -0.148                           |
| 20  | -2539.78                      | -0.135              | -2656.54                                   | -0.148                           |
| 21  | -2539.77                      | -0.135              | -2656.53                                   | -0.148                           |
| 22  | -2539.78                      | -0.135              | -2656.54                                   | -0.148                           |
| 23  | -2539.75                      | -0.135              | -2656.51                                   | -0.148                           |
| 24  | -2539.70                      | -0.135              | -2656.45                                   | -0.148                           |

| <b>Age</b> | <b>Incremental cost (Healthcare)</b> | <b>Incremental effects</b> | <b>Undiscounted incremental cost (Healthcare)</b> | <b>Undiscounted incremental effects</b> |
|------------|--------------------------------------|----------------------------|---------------------------------------------------|-----------------------------------------|
| 25         | -2539.72                             | -0.135                     | -2656.47                                          | -0.148                                  |
| 26         | -2539.60                             | -0.135                     | -2656.35                                          | -0.148                                  |
| 27         | -2539.61                             | -0.135                     | -2656.36                                          | -0.148                                  |
| 28         | -2539.59                             | -0.135                     | -2656.33                                          | -0.148                                  |
| 29         | -2539.44                             | -0.135                     | -2656.17                                          | -0.148                                  |
| 30         | -2539.23                             | -0.135                     | -2655.94                                          | -0.148                                  |
| 31         | -2538.95                             | -0.135                     | -2655.64                                          | -0.148                                  |
| 32         | -2538.67                             | -0.135                     | -2655.34                                          | -0.148                                  |
| 33         | -2538.45                             | -0.135                     | -2655.10                                          | -0.148                                  |
| 34         | -2538.22                             | -0.135                     | -2654.85                                          | -0.148                                  |
| 35         | -2537.87                             | -0.135                     | -2654.47                                          | -0.148                                  |
| 36         | -2537.38                             | -0.135                     | -2653.95                                          | -0.148                                  |
| 37         | -2537.03                             | -0.135                     | -2653.57                                          | -0.148                                  |
| 38         | -2536.72                             | -0.135                     | -2653.23                                          | -0.148                                  |
| 39         | -2536.27                             | -0.135                     | -2652.75                                          | -0.148                                  |
| 40         | -2535.96                             | -0.135                     | -2652.41                                          | -0.148                                  |
| 41         | -2535.36                             | -0.135                     | -2651.77                                          | -0.148                                  |
| 42         | -2534.94                             | -0.135                     | -2651.30                                          | -0.147                                  |
| 43         | -2534.14                             | -0.135                     | -2650.45                                          | -0.147                                  |
| 44         | -2533.47                             | -0.135                     | -2649.73                                          | -0.147                                  |
| 45         | -2532.86                             | -0.135                     | -2649.06                                          | -0.147                                  |
| 46         | -2532.11                             | -0.135                     | -2648.26                                          | -0.147                                  |
| 47         | -2531.54                             | -0.135                     | -2647.65                                          | -0.147                                  |
| 48         | -2531.06                             | -0.135                     | -2647.13                                          | -0.147                                  |
| 49         | -2530.43                             | -0.135                     | -2646.44                                          | -0.147                                  |
| 50         | -2529.58                             | -0.135                     | -2645.53                                          | -0.147                                  |
| 51         | -2528.75                             | -0.135                     | -2644.63                                          | -0.147                                  |
| 52         | -2527.72                             | -0.135                     | -2643.53                                          | -0.147                                  |
| 53         | -2526.94                             | -0.135                     | -2642.69                                          | -0.147                                  |
| 54         | -2526.48                             | -0.135                     | -2642.18                                          | -0.147                                  |
| 55         | -2525.20                             | -0.135                     | -2640.80                                          | -0.147                                  |
| 56         | -2523.61                             | -0.134                     | -2639.08                                          | -0.147                                  |
| 57         | -2521.75                             | -0.134                     | -2637.09                                          | -0.147                                  |
| 58         | -2520.94                             | -0.134                     | -2636.20                                          | -0.147                                  |
| 59         | -2519.00                             | -0.134                     | -2634.10                                          | -0.147                                  |
| 60         | -2516.68                             | -0.134                     | -2631.61                                          | -0.146                                  |

| <b>Age</b> | <b>Incremental cost (Healthcare)</b> | <b>Incremental effects</b> | <b>Undiscounted incremental cost (Healthcare)</b> | <b>Undiscounted incremental effects</b> |
|------------|--------------------------------------|----------------------------|---------------------------------------------------|-----------------------------------------|
| 61         | -2514.88                             | -0.134                     | -2629.67                                          | -0.146                                  |
| 62         | -2512.68                             | -0.134                     | -2627.29                                          | -0.146                                  |
| 63         | -2510.92                             | -0.134                     | -2625.37                                          | -0.146                                  |
| 64         | -2507.56                             | -0.134                     | -2621.76                                          | -0.146                                  |
| 65         | -2503.65                             | -0.133                     | -2617.57                                          | -0.146                                  |
| 66         | -2501.68                             | -0.133                     | -2615.37                                          | -0.146                                  |
| 67         | -2496.20                             | -0.133                     | -2609.43                                          | -0.145                                  |
| 68         | -2487.95                             | -0.133                     | -2600.57                                          | -0.145                                  |
| 69         | -2480.85                             | -0.132                     | -2592.93                                          | -0.144                                  |
| 70         | -2474.96                             | -0.132                     | -2586.54                                          | -0.144                                  |
| 71         | -2466.42                             | -0.131                     | -2577.30                                          | -0.144                                  |
| 72         | -2455.28                             | -0.131                     | -2565.29                                          | -0.143                                  |
| 73         | -2444.20                             | -0.130                     | -2553.32                                          | -0.142                                  |
| 74         | -2430.16                             | -0.130                     | -2538.17                                          | -0.142                                  |
| 75         | -2414.96                             | -0.129                     | -2521.75                                          | -0.141                                  |

# The Netherlands

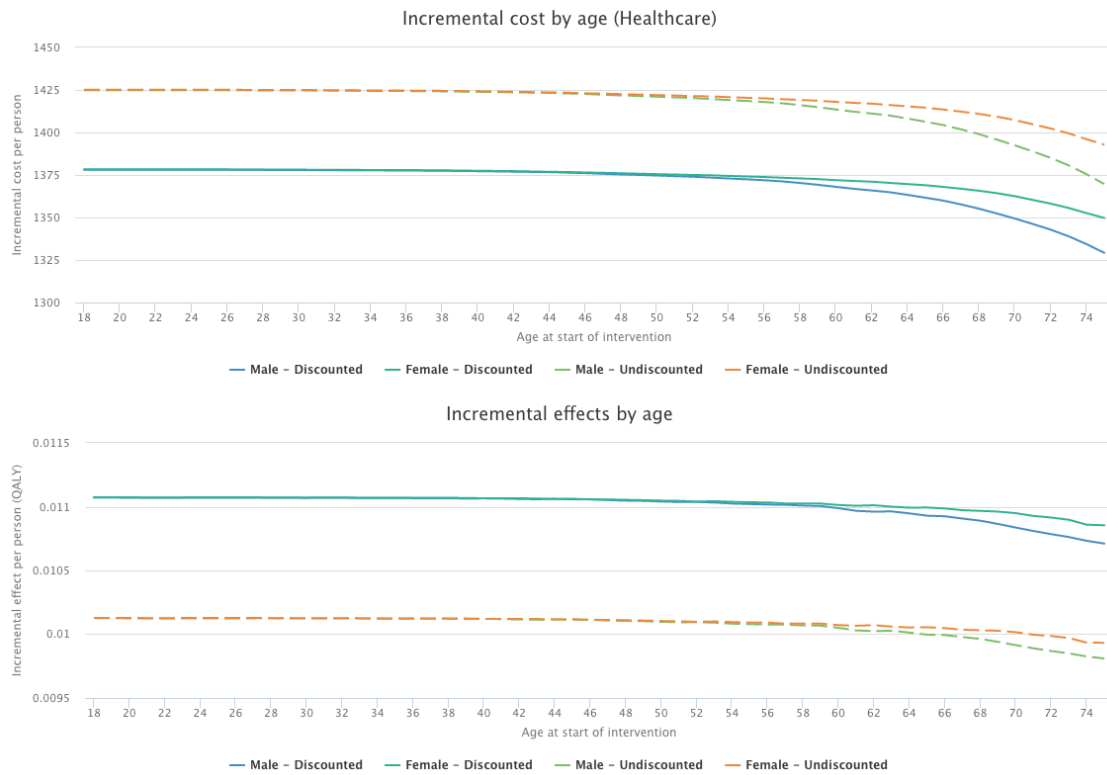

Figure 2: Incremental cost and effects by age for the Netherlands.

**Table 3:** Incremental costs and effects for the Netherlands (Male)

| Age | Incremental cost (Healthcare) | Incremental effects | Undiscounted incremental cost (Healthcare) | Undiscounted incremental effects |
|-----|-------------------------------|---------------------|--------------------------------------------|----------------------------------|
| 18  | 1378.10                       | 0.011               | 1424.91                                    | 0.010                            |
| 19  | 1378.08                       | 0.011               | 1424.88                                    | 0.010                            |
| 20  | 1378.03                       | 0.011               | 1424.83                                    | 0.010                            |
| 21  | 1378.04                       | 0.011               | 1424.84                                    | 0.010                            |
| 22  | 1378.04                       | 0.011               | 1424.83                                    | 0.010                            |
| 23  | 1378.02                       | 0.011               | 1424.82                                    | 0.010                            |
| 24  | 1378.04                       | 0.011               | 1424.84                                    | 0.010                            |
| 25  | 1378.03                       | 0.011               | 1424.83                                    | 0.010                            |
| 26  | 1378.02                       | 0.011               | 1424.82                                    | 0.010                            |
| 27  | 1378.00                       | 0.011               | 1424.80                                    | 0.010                            |
| 28  | 1377.98                       | 0.011               | 1424.77                                    | 0.010                            |
| 29  | 1377.94                       | 0.011               | 1424.73                                    | 0.010                            |
| 30  | 1377.91                       | 0.011               | 1424.70                                    | 0.010                            |
| 31  | 1377.90                       | 0.011               | 1424.68                                    | 0.010                            |
| 32  | 1377.84                       | 0.011               | 1424.61                                    | 0.010                            |
| 33  | 1377.79                       | 0.011               | 1424.56                                    | 0.010                            |
| 34  | 1377.73                       | 0.011               | 1424.49                                    | 0.010                            |
| 35  | 1377.68                       | 0.011               | 1424.43                                    | 0.010                            |
| 36  | 1377.62                       | 0.011               | 1424.36                                    | 0.010                            |
| 37  | 1377.55                       | 0.011               | 1424.28                                    | 0.010                            |
| 38  | 1377.47                       | 0.011               | 1424.19                                    | 0.010                            |
| 39  | 1377.35                       | 0.011               | 1424.06                                    | 0.010                            |
| 40  | 1377.24                       | 0.011               | 1423.94                                    | 0.010                            |
| 41  | 1377.10                       | 0.011               | 1423.78                                    | 0.010                            |
| 42  | 1376.93                       | 0.011               | 1423.59                                    | 0.010                            |
| 43  | 1376.80                       | 0.011               | 1423.44                                    | 0.010                            |
| 44  | 1376.69                       | 0.011               | 1423.31                                    | 0.010                            |
| 45  | 1376.37                       | 0.011               | 1422.95                                    | 0.010                            |
| 46  | 1376.09                       | 0.011               | 1422.63                                    | 0.010                            |
| 47  | 1375.70                       | 0.011               | 1422.19                                    | 0.010                            |
| 48  | 1375.34                       | 0.011               | 1421.79                                    | 0.010                            |
| 49  | 1375.04                       | 0.011               | 1421.44                                    | 0.010                            |
| 50  | 1374.69                       | 0.011               | 1421.05                                    | 0.010                            |
| 51  | 1374.33                       | 0.011               | 1420.64                                    | 0.010                            |
| 52  | 1373.98                       | 0.011               | 1420.24                                    | 0.010                            |



| Age | Incremental cost (Healthcare) | Incremental effects | Undiscounted incremental cost (Healthcare) | Undiscounted incremental effects |
|-----|-------------------------------|---------------------|--------------------------------------------|----------------------------------|
| 53  | 1373.49                       | 0.011               | 1419.69                                    | 0.010                            |
| 54  | 1372.96                       | 0.011               | 1419.10                                    | 0.010                            |
| 55  | 1372.47                       | 0.011               | 1418.55                                    | 0.010                            |
| 56  | 1371.93                       | 0.011               | 1417.93                                    | 0.010                            |
| 57  | 1371.25                       | 0.011               | 1417.16                                    | 0.010                            |
| 58  | 1370.31                       | 0.011               | 1416.09                                    | 0.010                            |
| 59  | 1369.25                       | 0.011               | 1414.89                                    | 0.010                            |
| 60  | 1368.04                       | 0.011               | 1413.53                                    | 0.010                            |
| 61  | 1366.89                       | 0.011               | 1412.25                                    | 0.010                            |
| 62  | 1365.92                       | 0.011               | 1411.14                                    | 0.010                            |
| 63  | 1364.89                       | 0.011               | 1409.97                                    | 0.010                            |
| 64  | 1363.33                       | 0.011               | 1408.21                                    | 0.010                            |
| 65  | 1361.66                       | 0.011               | 1406.32                                    | 0.010                            |
| 66  | 1359.95                       | 0.011               | 1404.38                                    | 0.010                            |
| 67  | 1357.69                       | 0.011               | 1401.82                                    | 0.010                            |
| 68  | 1355.19                       | 0.011               | 1399.00                                    | 0.010                            |
| 69  | 1352.35                       | 0.011               | 1395.80                                    | 0.010                            |
| 70  | 1349.38                       | 0.011               | 1392.45                                    | 0.010                            |
| 71  | 1346.21                       | 0.011               | 1388.87                                    | 0.010                            |
| 72  | 1342.86                       | 0.011               | 1385.08                                    | 0.010                            |
| 73  | 1338.99                       | 0.011               | 1380.70                                    | 0.010                            |
| 74  | 1334.39                       | 0.011               | 1375.50                                    | 0.010                            |
| 75  | 1329.22                       | 0.011               | 1369.66                                    | 0.010                            |

**Table 4:** Incremental costs and effects for the Netherlands (Female)

| Age | Incremental cost (Healthcare) | Incremental effects | Undiscounted incremental cost (Healthcare) | Undiscounted incremental effects |
|-----|-------------------------------|---------------------|--------------------------------------------|----------------------------------|
| 18  | 1378.35                       | 0.011               | 1425.19                                    | 0.010                            |
| 19  | 1378.33                       | 0.011               | 1425.16                                    | 0.010                            |
| 20  | 1378.30                       | 0.011               | 1425.14                                    | 0.010                            |
| 21  | 1378.29                       | 0.011               | 1425.12                                    | 0.010                            |
| 22  | 1378.30                       | 0.011               | 1425.14                                    | 0.010                            |
| 23  | 1378.33                       | 0.011               | 1425.16                                    | 0.010                            |
| 24  | 1378.34                       | 0.011               | 1425.18                                    | 0.010                            |
| 25  | 1378.30                       | 0.011               | 1425.13                                    | 0.010                            |

| <b>Age</b> | <b>Incremental cost (Healthcare)</b> | <b>Incremental effects</b> | <b>Undiscounted incremental cost (Healthcare)</b> | <b>Undiscounted incremental effects</b> |
|------------|--------------------------------------|----------------------------|---------------------------------------------------|-----------------------------------------|
| 26         | 1378.27                              | 0.011                      | 1425.10                                           | 0.010                                   |
| 27         | 1378.24                              | 0.011                      | 1425.07                                           | 0.010                                   |
| 28         | 1378.19                              | 0.011                      | 1425.01                                           | 0.010                                   |
| 29         | 1378.18                              | 0.011                      | 1425.00                                           | 0.010                                   |
| 30         | 1378.13                              | 0.011                      | 1424.95                                           | 0.010                                   |
| 31         | 1378.11                              | 0.011                      | 1424.92                                           | 0.010                                   |
| 32         | 1378.07                              | 0.011                      | 1424.87                                           | 0.010                                   |
| 33         | 1378.00                              | 0.011                      | 1424.79                                           | 0.010                                   |
| 34         | 1377.96                              | 0.011                      | 1424.75                                           | 0.010                                   |
| 35         | 1377.92                              | 0.011                      | 1424.70                                           | 0.010                                   |
| 36         | 1377.88                              | 0.011                      | 1424.66                                           | 0.010                                   |
| 37         | 1377.82                              | 0.011                      | 1424.59                                           | 0.010                                   |
| 38         | 1377.73                              | 0.011                      | 1424.49                                           | 0.010                                   |
| 39         | 1377.62                              | 0.011                      | 1424.37                                           | 0.010                                   |
| 40         | 1377.50                              | 0.011                      | 1424.22                                           | 0.010                                   |
| 41         | 1377.38                              | 0.011                      | 1424.09                                           | 0.010                                   |
| 42         | 1377.27                              | 0.011                      | 1423.97                                           | 0.010                                   |
| 43         | 1377.09                              | 0.011                      | 1423.76                                           | 0.010                                   |
| 44         | 1376.88                              | 0.011                      | 1423.53                                           | 0.010                                   |
| 45         | 1376.75                              | 0.011                      | 1423.38                                           | 0.010                                   |
| 46         | 1376.47                              | 0.011                      | 1423.07                                           | 0.010                                   |
| 47         | 1376.28                              | 0.011                      | 1422.84                                           | 0.010                                   |
| 48         | 1376.03                              | 0.011                      | 1422.57                                           | 0.010                                   |
| 49         | 1375.75                              | 0.011                      | 1422.25                                           | 0.010                                   |
| 50         | 1375.51                              | 0.011                      | 1421.98                                           | 0.010                                   |
| 51         | 1375.29                              | 0.011                      | 1421.73                                           | 0.010                                   |
| 52         | 1375.00                              | 0.011                      | 1421.40                                           | 0.010                                   |
| 53         | 1374.84                              | 0.011                      | 1421.22                                           | 0.010                                   |
| 54         | 1374.46                              | 0.011                      | 1420.79                                           | 0.010                                   |
| 55         | 1374.11                              | 0.011                      | 1420.40                                           | 0.010                                   |
| 56         | 1373.82                              | 0.011                      | 1420.07                                           | 0.010                                   |
| 57         | 1373.38                              | 0.011                      | 1419.57                                           | 0.010                                   |
| 58         | 1373.01                              | 0.011                      | 1419.15                                           | 0.010                                   |
| 59         | 1372.57                              | 0.011                      | 1418.66                                           | 0.010                                   |
| 60         | 1371.98                              | 0.011                      | 1417.99                                           | 0.010                                   |
| 61         | 1371.48                              | 0.011                      | 1417.43                                           | 0.010                                   |

| <b>Age</b> | <b>Incremental cost<br/>(Healthcare)</b> | <b>Incremental<br/>effects</b> | <b>Undiscounted<br/>incremental cost<br/>(Healthcare)</b> | <b>Undiscounted<br/>incremental effects</b> |
|------------|------------------------------------------|--------------------------------|-----------------------------------------------------------|---------------------------------------------|
| 62         | 1371.08                                  | 0.011                          | 1416.97                                                   | 0.010                                       |
| 63         | 1370.35                                  | 0.011                          | 1416.15                                                   | 0.010                                       |
| 64         | 1369.67                                  | 0.011                          | 1415.37                                                   | 0.010                                       |
| 65         | 1368.99                                  | 0.011                          | 1414.60                                                   | 0.010                                       |
| 66         | 1368.02                                  | 0.011                          | 1413.51                                                   | 0.010                                       |
| 67         | 1366.92                                  | 0.011                          | 1412.27                                                   | 0.010                                       |
| 68         | 1365.74                                  | 0.011                          | 1410.93                                                   | 0.010                                       |
| 69         | 1364.29                                  | 0.011                          | 1409.29                                                   | 0.010                                       |
| 70         | 1362.54                                  | 0.011                          | 1407.31                                                   | 0.010                                       |
| 71         | 1360.34                                  | 0.011                          | 1404.82                                                   | 0.010                                       |
| 72         | 1358.18                                  | 0.011                          | 1402.38                                                   | 0.010                                       |
| 73         | 1355.64                                  | 0.011                          | 1399.51                                                   | 0.010                                       |
| 74         | 1352.60                                  | 0.011                          | 1396.08                                                   | 0.010                                       |
| 75         | 1349.75                                  | 0.011                          | 1392.85                                                   | 0.010                                       |

# Taiwan

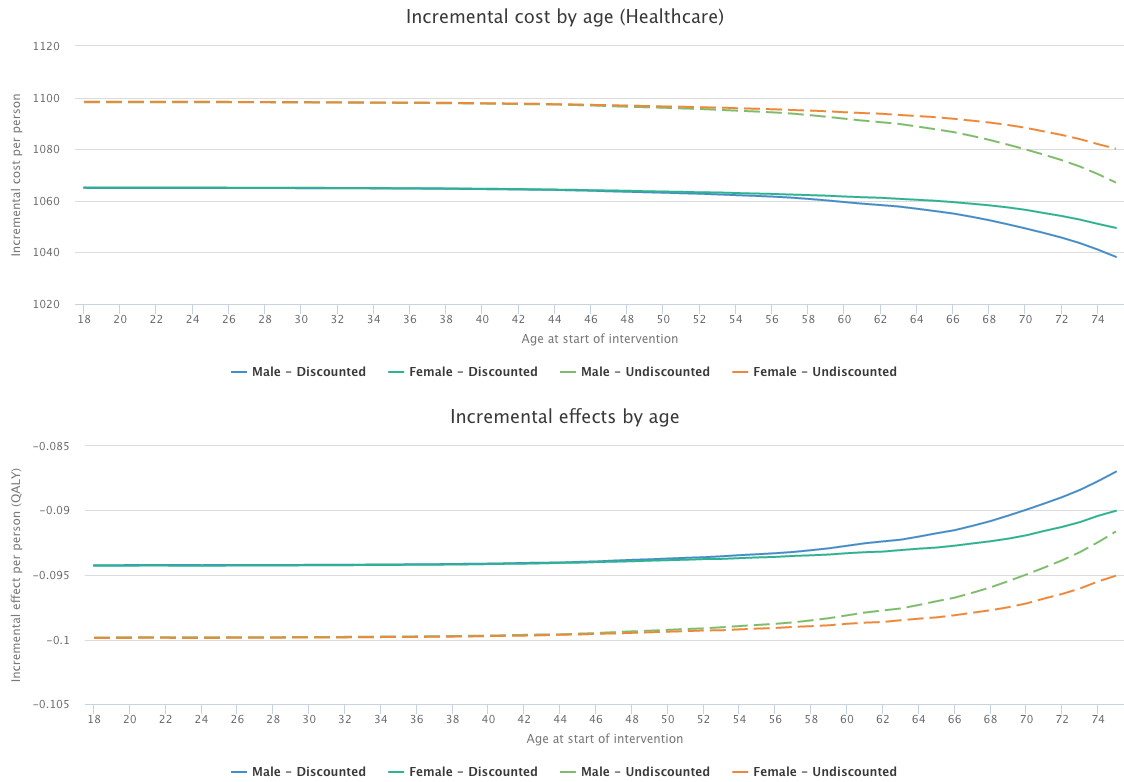

Figure 3: Incremental cost and effects by age for Taiwan.

**Table 5:** Incremental costs and effects for Taiwan (Male)

| Age | Incremental cost (Healthcare) | Incremental effects | Undiscounted incremental cost (Healthcare) | Undiscounted incremental effects |
|-----|-------------------------------|---------------------|--------------------------------------------|----------------------------------|
| 18  | 1065.01                       | -0.094              | 1098.23                                    | -0.100                           |
| 19  | 1065.00                       | -0.094              | 1098.22                                    | -0.100                           |
| 20  | 1064.97                       | -0.094              | 1098.19                                    | -0.100                           |
| 21  | 1064.98                       | -0.094              | 1098.19                                    | -0.100                           |
| 22  | 1064.98                       | -0.094              | 1098.19                                    | -0.100                           |
| 23  | 1064.97                       | -0.094              | 1098.18                                    | -0.100                           |
| 24  | 1064.98                       | -0.094              | 1098.20                                    | -0.100                           |
| 25  | 1064.97                       | -0.094              | 1098.19                                    | -0.100                           |
| 26  | 1064.97                       | -0.094              | 1098.18                                    | -0.100                           |
| 27  | 1064.96                       | -0.094              | 1098.17                                    | -0.100                           |
| 28  | 1064.95                       | -0.094              | 1098.16                                    | -0.100                           |
| 29  | 1064.92                       | -0.094              | 1098.13                                    | -0.100                           |
| 30  | 1064.91                       | -0.094              | 1098.11                                    | -0.100                           |
| 31  | 1064.90                       | -0.094              | 1098.11                                    | -0.100                           |
| 32  | 1064.87                       | -0.094              | 1098.07                                    | -0.100                           |
| 33  | 1064.84                       | -0.094              | 1098.03                                    | -0.100                           |
| 34  | 1064.81                       | -0.094              | 1098.00                                    | -0.100                           |
| 35  | 1064.78                       | -0.094              | 1097.96                                    | -0.100                           |
| 36  | 1064.75                       | -0.094              | 1097.92                                    | -0.100                           |
| 37  | 1064.71                       | -0.094              | 1097.88                                    | -0.100                           |
| 38  | 1064.66                       | -0.094              | 1097.83                                    | -0.100                           |
| 39  | 1064.60                       | -0.094              | 1097.75                                    | -0.100                           |
| 40  | 1064.54                       | -0.094              | 1097.69                                    | -0.100                           |
| 41  | 1064.46                       | -0.094              | 1097.60                                    | -0.100                           |
| 42  | 1064.37                       | -0.094              | 1097.49                                    | -0.100                           |
| 43  | 1064.30                       | -0.094              | 1097.41                                    | -0.100                           |
| 44  | 1064.24                       | -0.094              | 1097.33                                    | -0.100                           |
| 45  | 1064.06                       | -0.094              | 1097.13                                    | -0.100                           |
| 46  | 1063.91                       | -0.094              | 1096.95                                    | -0.100                           |
| 47  | 1063.70                       | -0.094              | 1096.70                                    | -0.099                           |
| 48  | 1063.50                       | -0.094              | 1096.48                                    | -0.099                           |
| 49  | 1063.34                       | -0.094              | 1096.28                                    | -0.099                           |
| 50  | 1063.14                       | -0.094              | 1096.06                                    | -0.099                           |
| 51  | 1062.95                       | -0.094              | 1095.83                                    | -0.099                           |
| 52  | 1062.76                       | -0.094              | 1095.61                                    | -0.099                           |

| Age | Incremental cost (Healthcare) | Incremental effects | Undiscounted incremental cost (Healthcare) | Undiscounted incremental effects |
|-----|-------------------------------|---------------------|--------------------------------------------|----------------------------------|
| 53  | 1062.49                       | -0.094              | 1095.30                                    | -0.099                           |
| 54  | 1062.20                       | -0.093              | 1094.96                                    | -0.099                           |
| 55  | 1061.93                       | -0.093              | 1094.65                                    | -0.099                           |
| 56  | 1061.64                       | -0.093              | 1094.30                                    | -0.099                           |
| 57  | 1061.27                       | -0.093              | 1093.87                                    | -0.099                           |
| 58  | 1060.75                       | -0.093              | 1093.26                                    | -0.099                           |
| 59  | 1060.17                       | -0.093              | 1092.59                                    | -0.098                           |
| 60  | 1059.51                       | -0.093              | 1091.83                                    | -0.098                           |
| 61  | 1058.88                       | -0.093              | 1091.10                                    | -0.098                           |
| 62  | 1058.35                       | -0.092              | 1090.48                                    | -0.098                           |
| 63  | 1057.79                       | -0.092              | 1089.82                                    | -0.098                           |
| 64  | 1056.94                       | -0.092              | 1088.82                                    | -0.097                           |
| 65  | 1056.02                       | -0.092              | 1087.76                                    | -0.097                           |
| 66  | 1055.09                       | -0.092              | 1086.67                                    | -0.097                           |
| 67  | 1053.85                       | -0.091              | 1085.22                                    | -0.096                           |
| 68  | 1052.48                       | -0.091              | 1083.63                                    | -0.096                           |
| 69  | 1050.93                       | -0.090              | 1081.83                                    | -0.095                           |
| 70  | 1049.31                       | -0.090              | 1079.94                                    | -0.095                           |
| 71  | 1047.57                       | -0.089              | 1077.92                                    | -0.094                           |
| 72  | 1045.74                       | -0.089              | 1075.78                                    | -0.094                           |
| 73  | 1043.61                       | -0.088              | 1073.31                                    | -0.093                           |
| 74  | 1041.09                       | -0.088              | 1070.37                                    | -0.092                           |
| 75  | 1038.27                       | -0.087              | 1067.08                                    | -0.092                           |

**Table 6:** Incremental costs and effects for Taiwan (Female)

| Age | Incremental cost (Healthcare) | Incremental effects | Undiscounted incremental cost (Healthcare) | Undiscounted incremental effects |
|-----|-------------------------------|---------------------|--------------------------------------------|----------------------------------|
| 18  | 1065.15                       | -0.094              | 1098.39                                    | -0.100                           |
| 19  | 1065.13                       | -0.094              | 1098.37                                    | -0.100                           |
| 20  | 1065.12                       | -0.094              | 1098.36                                    | -0.100                           |
| 21  | 1065.11                       | -0.094              | 1098.35                                    | -0.100                           |
| 22  | 1065.12                       | -0.094              | 1098.36                                    | -0.100                           |
| 23  | 1065.13                       | -0.094              | 1098.38                                    | -0.100                           |
| 24  | 1065.14                       | -0.094              | 1098.39                                    | -0.100                           |

| <b>Age</b> | <b>Incremental cost (Healthcare)</b> | <b>Incremental effects</b> | <b>Undiscounted incremental cost (Healthcare)</b> | <b>Undiscounted incremental effects</b> |
|------------|--------------------------------------|----------------------------|---------------------------------------------------|-----------------------------------------|
| 25         | 1065.12                              | -0.094                     | 1098.36                                           | -0.100                                  |
| 26         | 1065.11                              | -0.094                     | 1098.34                                           | -0.100                                  |
| 27         | 1065.09                              | -0.094                     | 1098.32                                           | -0.100                                  |
| 28         | 1065.06                              | -0.094                     | 1098.29                                           | -0.100                                  |
| 29         | 1065.06                              | -0.094                     | 1098.29                                           | -0.100                                  |
| 30         | 1065.03                              | -0.094                     | 1098.25                                           | -0.100                                  |
| 31         | 1065.02                              | -0.094                     | 1098.24                                           | -0.100                                  |
| 32         | 1064.99                              | -0.094                     | 1098.21                                           | -0.100                                  |
| 33         | 1064.95                              | -0.094                     | 1098.17                                           | -0.100                                  |
| 34         | 1064.93                              | -0.094                     | 1098.14                                           | -0.100                                  |
| 35         | 1064.91                              | -0.094                     | 1098.12                                           | -0.100                                  |
| 36         | 1064.89                              | -0.094                     | 1098.09                                           | -0.100                                  |
| 37         | 1064.86                              | -0.094                     | 1098.05                                           | -0.100                                  |
| 38         | 1064.81                              | -0.094                     | 1098.00                                           | -0.100                                  |
| 39         | 1064.75                              | -0.094                     | 1097.93                                           | -0.100                                  |
| 40         | 1064.68                              | -0.094                     | 1097.85                                           | -0.100                                  |
| 41         | 1064.62                              | -0.094                     | 1097.77                                           | -0.100                                  |
| 42         | 1064.56                              | -0.094                     | 1097.70                                           | -0.100                                  |
| 43         | 1064.46                              | -0.094                     | 1097.59                                           | -0.100                                  |
| 44         | 1064.34                              | -0.094                     | 1097.45                                           | -0.100                                  |
| 45         | 1064.27                              | -0.094                     | 1097.37                                           | -0.100                                  |
| 46         | 1064.12                              | -0.094                     | 1097.19                                           | -0.100                                  |
| 47         | 1064.01                              | -0.094                     | 1097.07                                           | -0.100                                  |
| 48         | 1063.88                              | -0.094                     | 1096.92                                           | -0.099                                  |
| 49         | 1063.73                              | -0.094                     | 1096.74                                           | -0.099                                  |
| 50         | 1063.59                              | -0.094                     | 1096.58                                           | -0.099                                  |
| 51         | 1063.47                              | -0.094                     | 1096.44                                           | -0.099                                  |
| 52         | 1063.31                              | -0.094                     | 1096.26                                           | -0.099                                  |
| 53         | 1063.23                              | -0.094                     | 1096.16                                           | -0.099                                  |
| 54         | 1063.02                              | -0.094                     | 1095.92                                           | -0.099                                  |
| 55         | 1062.83                              | -0.094                     | 1095.69                                           | -0.099                                  |
| 56         | 1062.67                              | -0.094                     | 1095.51                                           | -0.099                                  |
| 57         | 1062.43                              | -0.094                     | 1095.23                                           | -0.099                                  |
| 58         | 1062.22                              | -0.093                     | 1094.99                                           | -0.099                                  |
| 59         | 1061.99                              | -0.093                     | 1094.71                                           | -0.099                                  |
| 60         | 1061.66                              | -0.093                     | 1094.34                                           | -0.099                                  |

| <b>Age</b> | <b>Incremental cost (Healthcare)</b> | <b>Incremental effects</b> | <b>Undiscounted incremental cost (Healthcare)</b> | <b>Undiscounted incremental effects</b> |
|------------|--------------------------------------|----------------------------|---------------------------------------------------|-----------------------------------------|
| 61         | 1061.39                              | -0.093                     | 1094.02                                           | -0.099                                  |
| 62         | 1061.17                              | -0.093                     | 1093.76                                           | -0.099                                  |
| 63         | 1060.78                              | -0.093                     | 1093.30                                           | -0.099                                  |
| 64         | 1060.40                              | -0.093                     | 1092.86                                           | -0.098                                  |
| 65         | 1060.03                              | -0.093                     | 1092.43                                           | -0.098                                  |
| 66         | 1059.50                              | -0.093                     | 1091.81                                           | -0.098                                  |
| 67         | 1058.90                              | -0.093                     | 1091.11                                           | -0.098                                  |
| 68         | 1058.25                              | -0.092                     | 1090.36                                           | -0.098                                  |
| 69         | 1057.46                              | -0.092                     | 1089.43                                           | -0.097                                  |
| 70         | 1056.51                              | -0.092                     | 1088.32                                           | -0.097                                  |
| 71         | 1055.30                              | -0.092                     | 1086.91                                           | -0.097                                  |
| 72         | 1054.12                              | -0.091                     | 1085.53                                           | -0.096                                  |
| 73         | 1052.73                              | -0.091                     | 1083.92                                           | -0.096                                  |
| 74         | 1051.06                              | -0.090                     | 1081.99                                           | -0.095                                  |
| 75         | 1049.51                              | -0.090                     | 1080.16                                           | -0.095                                  |
